# Supplementary material for: Gene expression changes reflect clinical response in a placebo-controlled randomized trial of abatacept in patients with diffuse cutaneous systemic sclerosis
Source: PubMed Central journal article supplement (PMC4487200; doi:10.1186/s13075-015-0669-3), 2015-06-13

**A**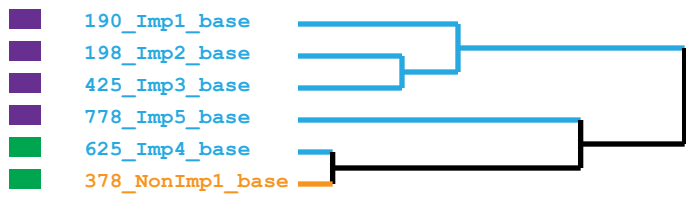

**Baseline  
intrinsic subset**

**B**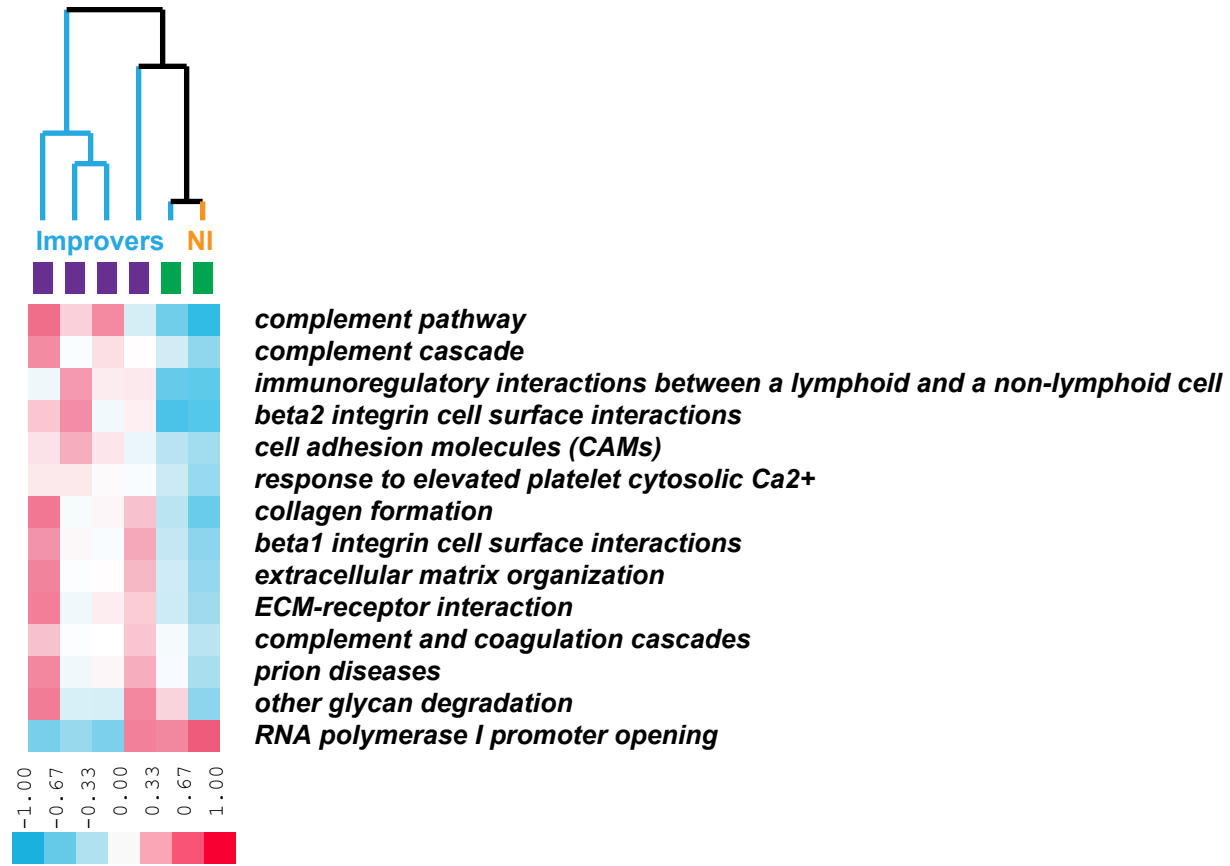

Supplement: 13075_2015_669_MOESM6_ESM.pdf [file 13075_2015_669_MOESM6_ESM.pdf]
