# Supplementary material for: Gene expression changes reflect clinical response in a placebo-controlled randomized trial of abatacept in patients with diffuse cutaneous systemic sclerosis
Source: PubMed Central journal article supplement (PMC4487200; doi:10.1186/s13075-015-0669-3), 2015-06-13
Supplement: 13075_2015_669_MOESM7_ESM.pdf [file 13075_2015_669_MOESM7_ESM.pdf]

**Imp\_UpBase**

**Imp\_DownBase**

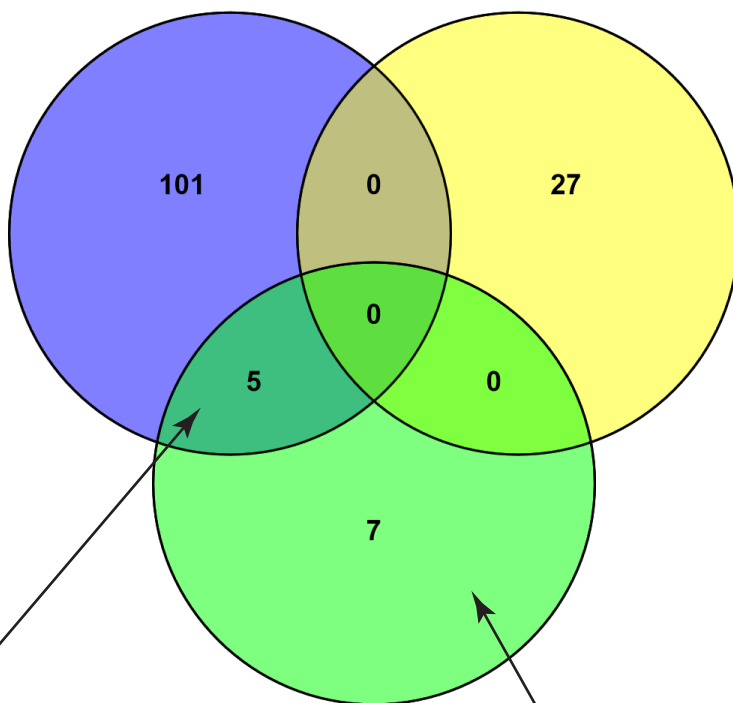

*allograft rejection*  
*IL12-mediated signaling events*  
*graft-versus-host disease*  
*NOD-like receptor signaling pathway*  
*Toll-like receptor signaling pathway*

**Pla-Imp\_DownBase**

*calcineurin-regulated NFAT-dependent transcription in lymphocytes*  
*downstream signaling in naïve CD8+ T cells*  
*regulation of hematopoiesis by cytokines*  
*calcium signaling in the CD4+ TCR pathway*  
*cytokine network*  
*NFkB activation by nontypeable Hemophilus influenzae*  
*IL-17 signaling pathway*
