# Supplementary material for: Gene expression changes reflect clinical response in a placebo-controlled randomized trial of abatacept in patients with diffuse cutaneous systemic sclerosis
Source: Arthritis Res Ther. 2015 Jun 13;17(1):159. doi: 10.1186/s13075-015-0669-3 (PMC4487200; doi:10.1186/s13075-015-0669-3)
Supplement: Additional file 2: — Spearman correlation statistics for intrinsic gene centroids. Spearman correlation statistics for expression centroids for 645 intrinsic genes across abatacept samples. First worksheet lists correlation coefficients and second worksheet lists associated p-values. [file 13075_2015_669_MOESM2_ESM.xlsx]

## Sheet: Spearman_rs
Sample ID	proliferative centroid	inflammatory centroid	normal-like centroid
190_Imp1_base	0.04708	0.1468	-0.1665
257_Imp1_post	-0.2012	0.2368	0.1748
198_Imp2_base	-0.007773	0.3172	-0.2194
277_Imp2_post	0.2888	-0.04188	-0.2901
425_Imp3_base	-0.0703	0.2766	-0.0967
483_Imp3_post	-0.06114	0.1367	-0.05643
625_Imp4_base	-0.03103	-0.1353	0.2037
688_Imp4_post	0.267	-0.3793	-0.05535
778_Imp5_base	-0.03987	0.2282	-0.1036
843_Imp5_post	0.06414	-0.132	-0.0409
378_NonImp1_base	0.009704	-0.239	0.1309
443_NonImp1_post	0.1298	-0.1184	-0.1396
235_Plb1_base	-0.1245	-0.1166	0.2475
321_Plb1_post	-0.1373	0.04683	0.1382
362_Plb2_base	0.0398	0.115	-0.1556
433_Plb2_post	-0.07447	0.2848	-0.1141
4mm_1	0.02692	-0.249	0.1291
4mm_2	-0.08081	-0.09766	0.1959
4mm_skin discard	0.04528	-0.1672	0.07518
4mm_skin discard (2)	0.05467	-0.1929	0.06486

## Sheet: Spearman_pvalue
Sample ID	proliferative centroid	inflammatory centroid	normal-like centroid
190_Imp1_base	0.2324	0.0002	< 0.0001
257_Imp1_post	< 0.0001	< 0.0001	< 0.0001
198_Imp2_base	0.8438	< 0.0001	< 0.0001
277_Imp2_post	< 0.0001	0.2882	< 0.0001
425_Imp3_base	0.0744	< 0.0001	0.014
483_Imp3_post	0.1208	0.0005	0.1523
625_Imp4_base	0.4314	0.0006	< 0.0001
688_Imp4_post	< 0.0001	< 0.0001	0.1603
778_Imp5_base	0.3121	< 0.0001	0.0085
843_Imp5_post	0.1036	0.0008	0.2997
378_NonImp1_base	0.8057	< 0.0001	0.0009
443_NonImp1_post	0.001	0.0026	0.0004
235_Plb1_base	0.0015	0.003	< 0.0001
321_Plb1_post	0.0005	0.2349	0.0004
362_Plb2_base	0.3128	0.0034	< 0.0001
433_Plb2_post	0.0587	< 0.0001	0.0037
4mm_1	0.495	< 0.0001	0.001
4mm_2	0.0402	0.0131	< 0.0001
4mm_skin discard	0.2508	< 0.0001	0.0563
4mm_skin discard (2)	0.1655	< 0.0001	0.0998
