# Supplementary material for: Gene expression changes reflect clinical response in a placebo-controlled randomized trial of abatacept in patients with diffuse cutaneous systemic sclerosis
Source: Arthritis Res Ther. 2015 Jun 13;17(1):159. doi: 10.1186/s13075-015-0669-3 (PMC4487200; doi:10.1186/s13075-015-0669-3)
Supplement: Additional file 5: — Complete list of pathways significantly (FDR <10 %) changed in abatacept improvers. (A) Pathways upregulated in baseline and downregulated in post-treatment samples. (B) Pathways downregulated in baseline and upregulated in post-treatment samples. For each pathway, the following information is provided: pathway name, size (number of annotated genes), core enrichment (number of annotated genes that contribute most to the enrichment result), p-value and FDR q-value. [file 13075_2015_669_MOESM5_ESM.xlsx]

## Sheet: A
Name	Size	Core enrichment	p-value	FDR q-value
KEGG_LEISHMANIA_INFECTION	70	35	0	0.0014386
REACTOME_INTERFERON_GAMMA_SIGNALING	59	35	0	0.00145798
REACTOME_CHEMOKINE_RECEPTORS_BIND_CHEMOKINES	53	22	0	0.0137562
BIOCARTA_COMP_PATHWAY	18	9	0	0.0141278
KEGG_ALLOGRAFT_REJECTION	37	21	0	0.0236024
REACTOME_SEMA4D_IN_SEMAPHORIN_SIGNALING	29	14	0	0.0266659
REACTOME_CLASS_A1_RHODOPSIN_LIKE_RECEPTORS	290	118	0	0.0344689
REACTOME_SEMA4D_INDUCED_CELL_MIGRATION_AND_GROWTH_CONE_COLLAPSE	24	12	0	0.0353096
REACTOME_INTERFERON_ALPHA_BETA_SIGNALING	59	37	0	0.035588
REACTOME_IMMUNOREGULATORY_INTERACTIONS_BETWEEN_A_LYMPHOID_AND_A_NON_LYMPHOID_CELL	62	31	0	0.036026
PID_IL12_2PATHWAY	63	23	0	0.0365842
KEGG_GRAFT_VERSUS_HOST_DISEASE	39	21	0	0.0378608
REACTOME_GPCR_LIGAND_BINDING	389	150	0	0.0382663
KEGG_TYPE_I_DIABETES_MELLITUS	43	20	0	0.0383813
SA_TRKA_RECEPTOR	17	6	0	0.0388964
REACTOME_TOLL_RECEPTOR_CASCADES	112	37	0	0.0394759
PID_IL6_7PATHWAY	47	32	0	0.0397872
KEGG_ECM_RECEPTOR_INTERACTION	84	38	0	0.0405172
REACTOME_INNATE_IMMUNE_SYSTEM	254	79	0	0.0405336
REACTOME_NUCLEOTIDE_LIKE_PURINERGIC_RECEPTORS	15	11	0.00628931	0.0408142
KEGG_NOD_LIKE_RECEPTOR_SIGNALING_PATHWAY	62	34	0	0.0414893
PID_SHP2_PATHWAY	58	16	0	0.0416471
KEGG_INTESTINAL_IMMUNE_NETWORK_FOR_IGA_PRODUCTION	48	16	0	0.0420302
REACTOME_NUCLEAR_EVENTS_KINASE_AND_TRANSCRIPTION_FACTOR_ACTIVATION	24	11	0	0.0425692
REACTOME_SEMAPHORIN_INTERACTIONS	64	16	0	0.0427405
REACTOME_TRIF_MEDIATED_TLR3_SIGNALING	72	25	0	0.0457131
KEGG_CYTOKINE_CYTOKINE_RECEPTOR_INTERACTION	256	74	0	0.0462521
BIOCARTA_GSK3_PATHWAY	27	11	0.00813008	0.0473262
BIOCARTA_IL6_PATHWAY	22	16	0.00205761	0.0476931
REACTOME_ANTIGEN_PRESENTATION_FOLDING_ASSEMBLY_AND_PEPTIDE_LOADING_OF_CLASS_I_MHC	20	14	0.00212766	0.0480937
PID_PDGFRBPATHWAY	129	60	0	0.0482974
REACTOME_NEGATIVE_REGULATION_OF_FGFR_SIGNALING	36	13	0.00413223	0.0488589
KEGG_CELL_ADHESION_MOLECULES_CAMS	133	56	0	0.0492618
REACTOME_COMPLEMENT_CASCADE	29	10	0.002	0.0494953
BIOCARTA_NKT_PATHWAY	29	17	0.004	0.0497297
BIOCARTA_TID_PATHWAY	19	11	0.00398406	0.0502035
BIOCARTA_LAIR_PATHWAY	17	5	0.00434783	0.0508843
KEGG_LINOLEIC_ACID_METABOLISM	28	15	0.002079	0.0510121
BIOCARTA_PTEN_PATHWAY	18	5	0.0021097	0.0516578
REACTOME_NEF_MEDIATES_DOWN_MODULATION_OF_CELL_SURFACE_RECEPTORS_BY_RECRUITING_THEM_TO_CLATHRIN_ADAPTERS	20	5	0.00209644	0.0518089
REACTOME_NFKB_AND_MAP_KINASES_ACTIVATION_MEDIATED_BY_TLR4_SIGNALING_REPERTOIRE	69	24	0	0.052164
REACTOME_G_ALPHA_I_SIGNALLING_EVENTS	190	66	0	0.0524791
REACTOME_ACTIVATED_NOTCH1_TRANSMITS_SIGNAL_TO_THE_NUCLEUS	26	11	0.0149573	0.052772
REACTOME_INTERFERON_SIGNALING	150	61	0	0.0529065
REACTOME_ERK_MAPK_TARGETS	21	10	0.00641026	0.0529665
REACTOME_P75_NTR_RECEPTOR_MEDIATED_SIGNALLING	79	21	0	0.0532118
BIOCARTA_UCALPAIN_PATHWAY	18	7	0.00828157	0.0539248
PID_TXA2PATHWAY	57	17	0.0021645	0.0540538
KEGG_ASTHMA	30	21	0.00446429	0.0540692
REACTOME_PEPTIDE_LIGAND_BINDING_RECEPTORS	181	66	0	0.0555688
REACTOME_INFLAMMASOMES	16	11	0.0106838	0.0556466
PID_IL23PATHWAY	37	13	0.00863931	0.0559112
REACTOME_ACTIVATED_TLR4_SIGNALLING	89	30	0	0.0567668
PID_ECADHERIN_KERATINOCYTE_PATHWAY	20	5	0.00209205	0.0599519
REACTOME_SIGNALLING_BY_NGF	212	46	0	0.0602039
REACTOME_MAPK_TARGETS_NUCLEAR_EVENTS_MEDIATED_BY_MAP_KINASES	30	12	0.00668151	0.0605734
PID_TRKRPATHWAY	62	20	0	0.0605748
PID_ANGIOPOIETINRECEPTOR_PATHWAY	50	17	0	0.0630692
PID_BCR_5PATHWAY	65	16	0.00212766	0.064386
KEGG_ENDOCYTOSIS	181	50	0	0.0650707
REACTOME_PHOSPHORYLATION_OF_CD3_AND_TCR_ZETA_CHAINS	16	12	0.00849257	0.0651242
BIOCARTA_INTEGRIN_PATHWAY	38	19	0.00635593	0.0659298
PID_P38_MK2PATHWAY	21	7	0.00643777	0.0663655
ST_MYOCYTE_AD_PATHWAY	27	7	0.00448431	0.0664609
KEGG_REGULATION_OF_ACTIN_CYTOSKELETON	212	68	0	0.0671273
BIOCARTA_AGR_PATHWAY	36	19	0.00811359	0.0678578
REACTOME_IL_RECEPTOR_SHC_SIGNALING	27	8	0.00804829	0.0680804
KEGG_MAPK_SIGNALING_PATHWAY	266	75	0	0.0686377
REACTOME_SIGNALING_BY_CONSTITUTIVELY_ACTIVE_EGFR	17	5	0.00211864	0.0695032
KEGG_TOLL_LIKE_RECEPTOR_SIGNALING_PATHWAY	97	29	0	0.0709838
BIOCARTA_IL22BP_PATHWAY	16	5	0.0198238	0.0719875
PID_INTEGRIN1_PATHWAY	66	27	0.00427351	0.072255
KEGG_AUTOIMMUNE_THYROID_DISEASE	48	21	0.00211416	0.0733472
PID_IL27PATHWAY	26	11	0.00614754	0.0735261
REACTOME_CTLA4_INHIBITORY_SIGNALING	21	3	0.0142276	0.0741099
REACTOME_MAP_KINASE_ACTIVATION_IN_TLR_CASCADE	49	21	0.00591716	0.074344
REACTOME_INTEGRIN_CELL_SURFACE_INTERACTIONS	79	28	0.00226244	0.0752854
REACTOME_COSTIMULATION_BY_THE_CD28_FAMILY	62	19	0.00660793	0.0769313
ST_G_ALPHA_I_PATHWAY	35	8	0.00646552	0.0805246
BIOCARTA_IL2_PATHWAY	22	6	0.0144033	0.0826103
REACTOME_GPVI_MEDIATED_ACTIVATION_CASCADE	31	8	0.00851064	0.0828548
REACTOME_CELL_DEATH_SIGNALLING_VIA_NRAGE_NRIF_AND_NADE	58	15	0.00898876	0.0831863
PID_CDC42_REG_PATHWAY	30	10	0.0105708	0.0832677
PID_SYNDECAN_1_PATHWAY	46	18	0.00443459	0.0838136
KEGG_CHEMOKINE_SIGNALING_PATHWAY	185	42	0	0.0839535
REACTOME_AXON_GUIDANCE	240	98	0	0.0839977
BIOCARTA_TOLL_PATHWAY	37	15	0.00819672	0.084295
REACTOME_SIGNALING_BY_FGFR_MUTANTS	43	13	0.0105708	0.0844619
PID_VEGFR1_2_PATHWAY	69	19	0.00227273	0.0845679
REACTOME_FRS2_MEDIATED_CASCADE	36	12	0.0104822	0.085032
PID_P75NTRPATHWAY	69	21	0.00426439	0.0854438
PID_RAC1_PATHWAY	54	24	0.00636943	0.0858634
PID_AVB3_INTEGRIN_PATHWAY	75	24	0.00431965	0.0858805
REACTOME_REGULATION_OF_KIT_SIGNALING	16	3	0.0271399	0.0867665
KEGG_NEUROTROPHIN_SIGNALING_PATHWAY	126	30	0	0.0920977
REACTOME_NEPHRIN_INTERACTIONS	19	5	0.0237581	0.0936409
REACTOME_NRAGE_SIGNALS_DEATH_THROUGH_JNK	43	12	0.0106838	0.0937518
PID_CD40_PATHWAY	31	11	0.0218818	0.0941817
REACTOME_CYTOKINE_SIGNALING_IN_IMMUNE_SYSTEM	259	71	0	0.0974693
REACTOME_SIGNAL_TRANSDUCTION_BY_L1	34	12	0.0133038	0.0982771
PID_IL12_STAT4PATHWAY	33	8	0.0125523	0.0983771
REACTOME_ANTIGEN_PROCESSING_CROSS_PRESENTATION	71	35	0.00875273	0.0986527
REACTOME_EXTRACELLULAR_MATRIX_ORGANIZATION	87	26	0.00642398	0.0987958
REACTOME_APOPTOTIC_CLEAVAGE_OF_CELLULAR_PROTEINS	37	11	0.0154525	0.0991507
REACTOME_THE_ROLE_OF_NEF_IN_HIV1_REPLICATION_AND_DISEASE_PATHOGENESIS	27	9	0.0189474	0.0991541
REACTOME_SIGNALING_BY_NOTCH1	68	23	0.00425532	0.0994639

## Sheet: B
Name	Size	Core enrichment	p-value	FDR q-value
REACTOME_RNA_POL_I_PROMOTER_OPENING	57	38	0	0
REACTOME_PACKAGING_OF_TELOMERE_ENDS	47	32	0	0
REACTOME_TELOMERE_MAINTENANCE	74	45	0	0
REACTOME_MEIOTIC_RECOMBINATION	79	45	0	0
REACTOME_RNA_POL_I_TRANSCRIPTION	80	46	0	0
REACTOME_RNA_POL_I_RNA_POL_III_AND_MITOCHONDRIAL_TRANSCRIPTION	113	58	0	0
REACTOME_DEPOSITION_OF_NEW_CENPA_CONTAINING_NUCLEOSOMES_AT_THE_CENTROMERE	61	36	0	0
REACTOME_AMYLOIDS	76	45	0	8.10512e-05
REACTOME_CHYLOMICRON_MEDIATED_LIPID_TRANSPORT	16	6	0	0.00093939
REACTOME_TRANSCRIPTION	199	86	0	0.00123529
REACTOME_MEIOSIS	107	50	0	0.00124399
REACTOME_CHROMOSOME_MAINTENANCE	117	54	0	0.00136129
REACTOME_G2_M_CHECKPOINTS	41	20	0	0.00270283
REACTOME_MEIOTIC_SYNAPSIS	70	37	0	0.00286182
REACTOME_ACTIVATION_OF_THE_PRE_REPLICATIVE_COMPLEX	30	15	0	0.002868
REACTOME_ACTIVATION_OF_ATR_IN_RESPONSE_TO_REPLICATION_STRESS	35	17	0	0.00451734
REACTOME_RESPIRATORY_ELECTRON_TRANSPORT	75	39	0	0.00725446
REACTOME_LIPOPROTEIN_METABOLISM	28	9	0	0.00806958
REACTOME_RESPIRATORY_ELECTRON_TRANSPORT_ATP_SYNTHESIS_BY_CHEMIOSMOTIC_COUPLING_AND_HEAT_PRODUCTION	93	44	0	0.0253303
REACTOME_ACTIVATION_OF_GENES_BY_ATF4	24	10	0.00191571	0.0265963
REACTOME_EXTENSION_OF_TELOMERES	27	14	0	0.0273
REACTOME_DNA_REPAIR	101	32	0	0.0297347
KEGG_ASCORBATE_AND_ALDARATE_METABOLISM	16	7	0.00761905	0.0391456
REACTOME_LIPID_DIGESTION_MOBILIZATION_AND_TRANSPORT	45	11	0	0.0391725
REACTOME_PERK_REGULATED_GENE_EXPRESSION	27	10	0.00189753	0.0439185
REACTOME_CELL_CYCLE	398	139	0	0.0564958
REACTOME_HDL_MEDIATED_LIPID_TRANSPORT	15	6	0.0151803	0.0888033
