# Supplementary material for: Gene expression changes reflect clinical response in a placebo-controlled randomized trial of abatacept in patients with diffuse cutaneous systemic sclerosis
Source: Springer Nature journal article supplement (doi:10.1186/s13075-015-0669-3), 2015-06-11

**A**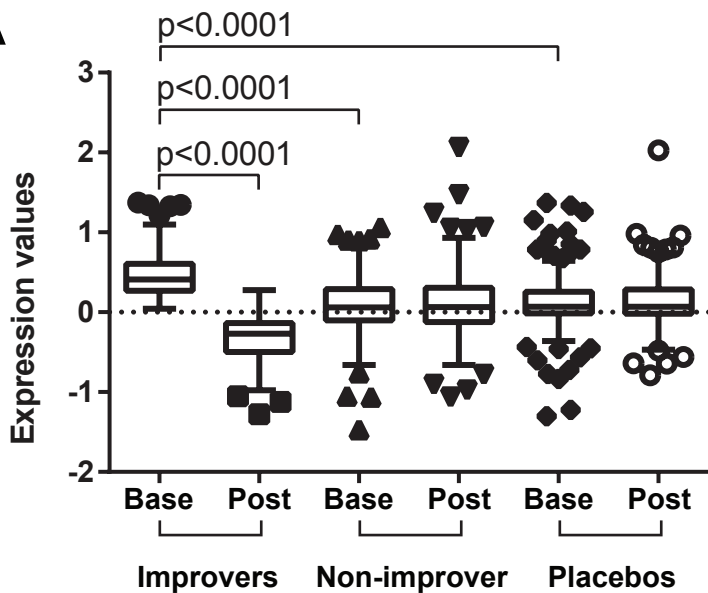**B**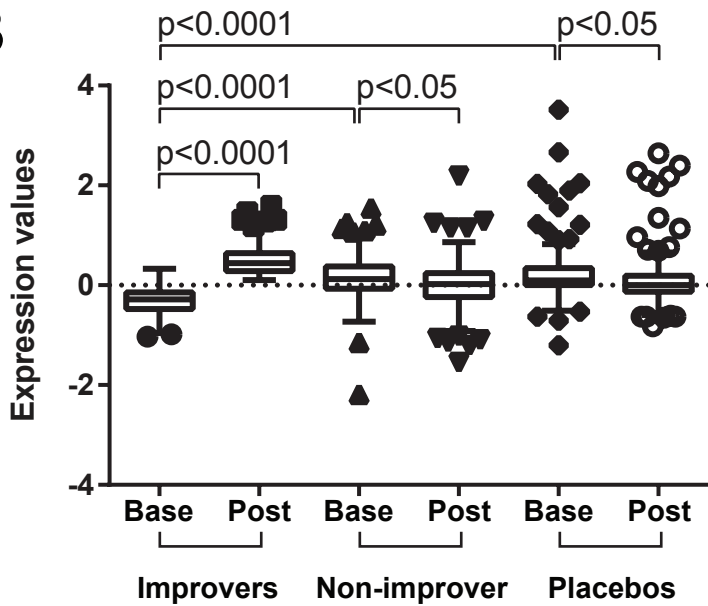

Supplement: MOESM4 [file 9783770]
